# Supplementary material for: Retention of Neutralizing Response against SARS-CoV-2 Omicron Variant in Sputnik V-Vaccinated Individuals
Source: MDPI journal article supplement (doi:10.3390/vaccines10050817), 2022-05-21
Supplement: s1 [file s1]

## Supplementary

**Table S1.** Summary table of participants vaccinated with Sputnik V

|                                | Sputnik V<br>(up to 6 months) | Sputnik V +<br>asymptomatic*<br>COVID-19 | Sputnik V + mild<br>COVID-19 |
|--------------------------------|-------------------------------|------------------------------------------|------------------------------|
| Number of individuals          | 31                            | 8                                        | 12                           |
| Age, years**                   | 33 (25-47)                    | 38.5 (27.25-44.75)                       | 36 (30.25-42.5)              |
| Male sex                       | 16 (51.6%)                    | 6 (75%)                                  | 11 (91.7%)                   |
| RBD-specific IgG,<br>BAU/ml ** | 416.6 (298.8-525.9)           | 878.1 (390.1-2772)                       | 767.2 (516.5-1459)           |

\* No COVID-19 in anamnesis, SARS-CoV-2 N-protein positive IgG.

\*\* values are median (interquartile range).

**Table S2.** Summary table of participants vaccinated with BNT162b2 (2w, 3m, 6m)

|                                                                          | BNT162b2            |
|--------------------------------------------------------------------------|---------------------|
| Number of individuals                                                    | 17                  |
| Age, years*                                                              | 37 (31-48)          |
| Male sex                                                                 | 9 (53%)             |
| RBD-specific IgG, BAU/ml *                                               | 562.7 (294.9-1640)  |
| RBD-specific IgG at time point “2 weeks after<br>vaccination”, BAU/ml *  | 2326 (1466-3562)    |
| RBD-specific IgG at time point “3 months after<br>vaccination”, BAU/ml * | 562.7 (365-901.8)   |
| RBD-specific IgG at time point “6 months after<br>vaccination”, BAU/ml * | 195.2 (133.2-318.5) |

\* values are median (interquartile range).

**Table S3.** Summary table of COVID-19 convalescent participants (samples collected at 1 to 3 months from symptom onset in march to December 2020, Italy and in January to March 2021 in Russia)

|                            | COVID-19            |
|----------------------------|---------------------|
| Number of individuals      | 23                  |
| Age, years*                | 42 (36-50)          |
| Male sex                   | 13 (56.5%)          |
| RBD-specific IgG, BAU/ml * | 266.5 (139.1-651.2) |

\* values are median (interquartile range).

**Table S4.** Decrease of NtAb to Omicron variant vs B.1 variant in sera of vaccinated according to basic level of RBD-specific IgG

| Group    | Sputnik V               |                                   | BNT162b2                |                                   |
|----------|-------------------------|-----------------------------------|-------------------------|-----------------------------------|
|          | NtAb decrease,<br>folds | % of sera with<br>detectable NtAb | NtAb decrease,<br>folds | % of sera with<br>detectable NtAb |
| Total    | 8.1                     | 74.2                              | 21.4                    | 56.9                              |
| 0-25%    | 10.4                    | 25                                | 24.5                    | 15.4                              |
| >25-50%  | 6.2                     | 87.5                              | 19.8                    | 46.2                              |
| >50-75%  | 11.3                    | 87.5                              | 16.9                    | 76.9                              |
| >75-100% | 5.9                     | 100                               | 25.4                    | 83.3                              |
| 0-50%    | 8.0                     | 56.3                              | 22.0                    | 34.6                              |
| >50-100% | 8.4                     | 93.3                              | 20.5                    | 80                                |
| >25-75%  | 8.4                     | 87.5                              | 18.3                    | 65.4                              |

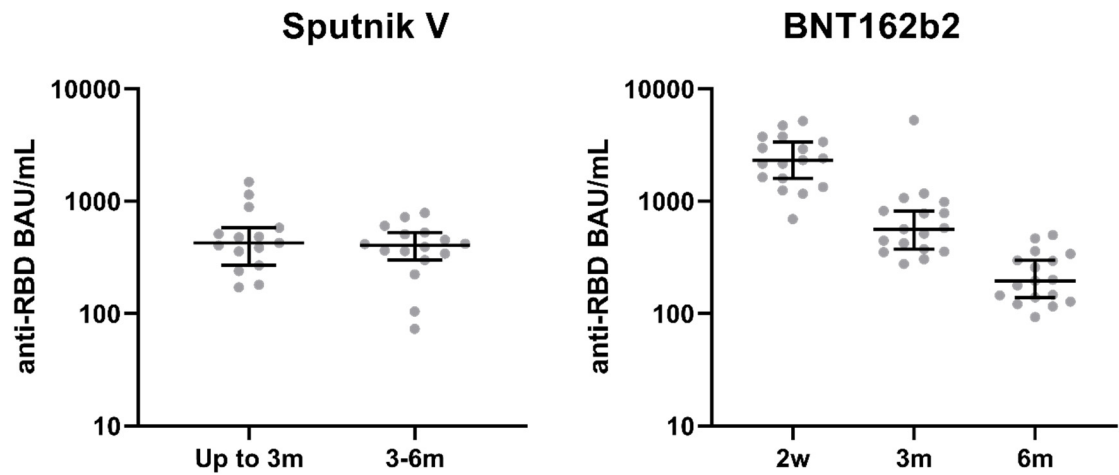

**Figure S1.** RBD-specific IgG (BAU/ml) in vaccinated individuals, median and 95% CI. W – weeks, m – months.

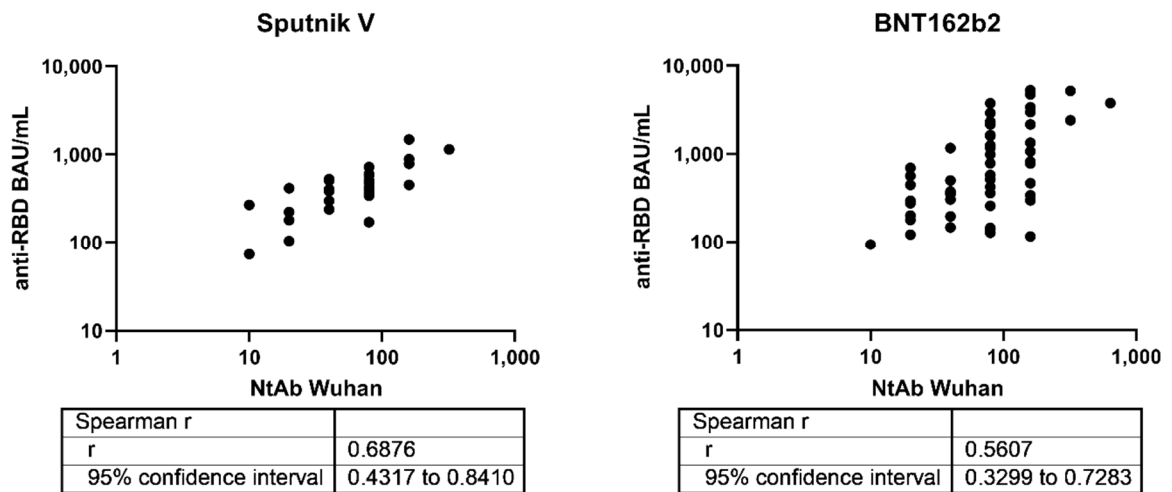

**Figure S2.** Correlation of RBD-specific IgG and NtAb titers in vaccinated individuals. Graphs show Spearman coefficient of correlation  $r$  and 95% CI.
